# Supplementary material for: Epigenetic Modification Agents Improve Genomic Methylation Reprogramming in Porcine Cloned Embryos
Source: PubMed Central journal article supplement — J Reprod Dev. 2014 Jul 21;60(5):377–82. doi: 10.1262/jrd.2014-062 (PMC4219995; doi:10.1262/jrd.2014-062), 2014-07-21
Supplement: jrd-60-377-s001.pdf [file jrd-60-377-s001.pdf]

**Supplementary Table 1.** Detail of primers for quantitative real-time PCR

| Gene          | Primer sequence (5'-3')           | Length<br>(bp) | Accession<br>number |
|---------------|-----------------------------------|----------------|---------------------|
| <i>Dnmt1</i>  | F:GCGTCTTGCAGGCTGGTCAGTA          | 152            | NM_001032355        |
|               | R:CTTCTTATCATCGACCACGACGCT        |                |                     |
| <i>Dnmt3a</i> | F:ATGTGGTTCGGAGACGGCAAGT          | 195            | NM_001097437        |
|               | R:GCTCTCGTCGTTGTCATGGCA           |                |                     |
| <i>Thy1</i>   | F:AACCCTACCATTGGCATCGCT           | 143            | NM_001146129        |
|               | R:TGAATGGGCAGGTTGGTGGT            |                |                     |
| <i>Col5a2</i> | F:AGATGTACTTAAACAGGGACATTTG<br>GA | 124            | NM_001105289        |
|               | R:GTTATGGGGTCAGCACATTCAAGC        |                |                     |
| <i>Oct4</i>   | F:GAAGGTGTTTCAGCCAAACGAC          | 185            | NM_001113060        |
|               | R:CGATACTTGTC CGCTTTC             |                |                     |
| <i>Nanog</i>  | F:CCTCCATGGATCTGCTTATTC           | 209            | NM_001129971        |
|               | R:CATCTGCTGGAGGCTGAGGT            |                |                     |
| <i>Sox2</i>   | F:AACCAGAAGAACAGCCCAGAC           | 155            | NM_001123197        |
|               | R:TCCGACAAAAGTTTCCAACCTCG         |                |                     |
| <i>Eif1a</i>  | F:AGATGAGGCTAGAAGTCTGAAGGC        | 113            | NM_001243218        |
|               | R:CAATGTCATCAAACCTGGATTTTCATC     |                |                     |
| <i>ATP1b1</i> | F:CCACCAGGATTAACACAGATTCC         | 185            | NM_001001542        |
|               | R:TCTTTGAGTTCGCTGGGCAC            |                |                     |
| <i>Cdx2</i>   | F:GACAAGGACGTGAGCATGTATCC         | 220            | XM_003130908        |
|               | R:CGTAGCCGTTCCAGTCCTCG            |                |                     |
| <i>18s</i>    | F:AATCTCGGGTGGCTGAACGC            | 143            | NR_002170           |
|               | R:CCGTTCTTAGTTGGTGGAGCGAT         |                |                     |
