# Supplementary material for: Epigenetic Modification Agents Improve Genomic Methylation Reprogramming in Porcine Cloned Embryos
Source: PubMed Central journal article supplement — J Reprod Dev. 2014 Jul 21;60(5):377–82. doi: 10.1262/jrd.2014-062 (PMC4219995; doi:10.1262/jrd.2014-062), 2014-07-21
Supplement: jrd-60-377-s002.pdf [file jrd-60-377-s002.pdf]

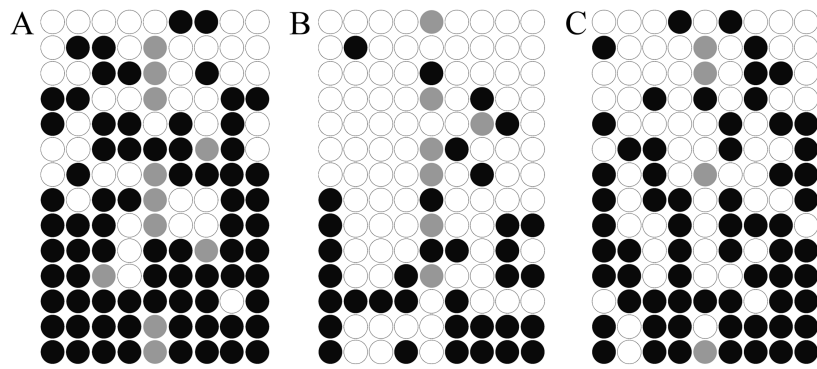

**Supplementary Fig. 1.** CenRep methylation status in sperm (A), oocytes (B) and PFFs (C).

Black or white circles represent methylated or unmethylated CpG sites, and gray circles represent mutated and/or single nucleotide polymorphism (SNP) variation at certain CpG sites.

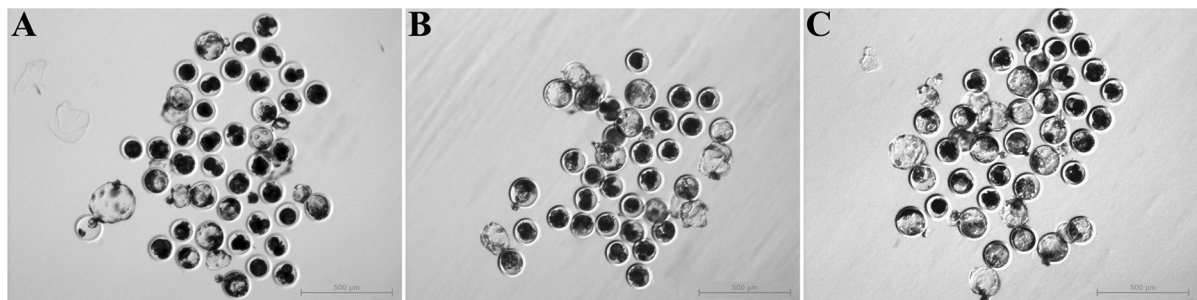

**Supplementary Fig. 2.** Blastocysts derived from cloned embryos that were untreated (A), treated with 25 nM 5-aza-dC (B) or treated with 40 nM TSA (C).

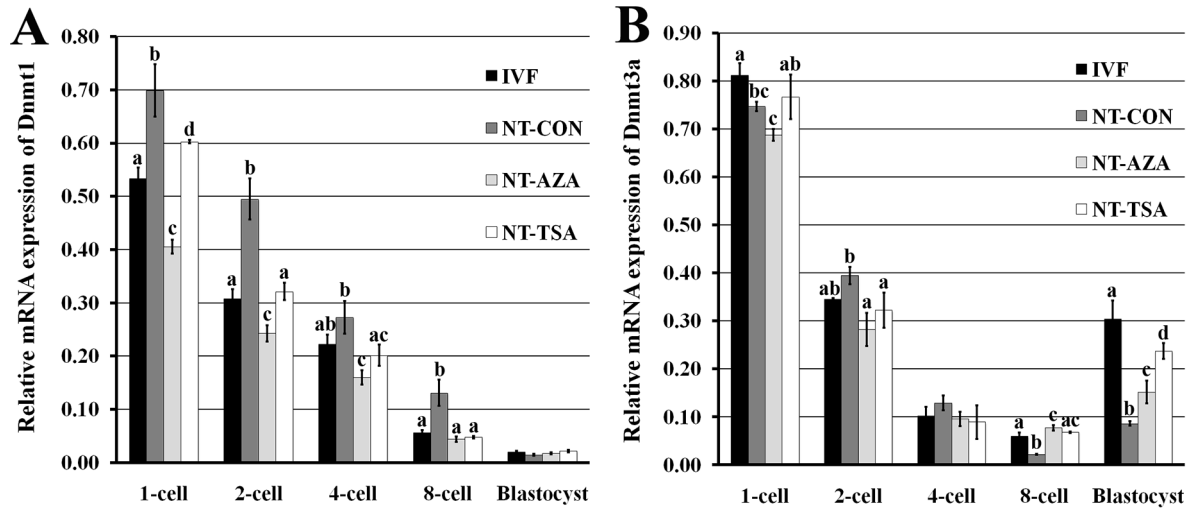

**Supplementary Fig. 3.** Relative mRNA expression of Dnmt1 (A) and Dnmt3a (B) in IVF, NT-CON, NT-AZA and NT-TSA embryos.

The transcript abundance in MII oocytes was considered the control.

The data are expressed as means  $\pm$  SEM.

<sup>a-d</sup> Values for a given gene at a certain stage in columns with different superscripts differ significantly ( $p < 0.05$ ).
